# Supplementary material
Source: publisher figshare collection journal article supplement (https://frontiersin.figshare.com/ndownloader/files/31135144)
Supplement: Supplementary file [file 31135144]

# Supplementary Figure

## Re-identification of patient subgroups in Uveal Melanoma

Yen T.H. Nguyen<sup>1,†</sup>, Tin Nguyen<sup>2</sup>, Quang-Huy Nguyen<sup>1,†\*</sup>, Duc-Hau Le<sup>1,3\*</sup>

<sup>1</sup>Department of Computational Biomedicine, Vingroup Big Data Institute, Hanoi, Vietnam.

<sup>2</sup>Department of Computer Science and Engineering, University of Nevada, Reno, NV, USA.

<sup>3</sup>College of Engineering and Computer Science, VinUniversity, Hanoi, Vietnam.

† these authors have contributed equally

\* To whom correspondence should be addressed. Tel: (84)912324564; Email: [huynguyen96.dnu@gmail.com](mailto:huynguyen96.dnu@gmail.com), [hauldhut@gmail.com](mailto:hauldhut@gmail.com).

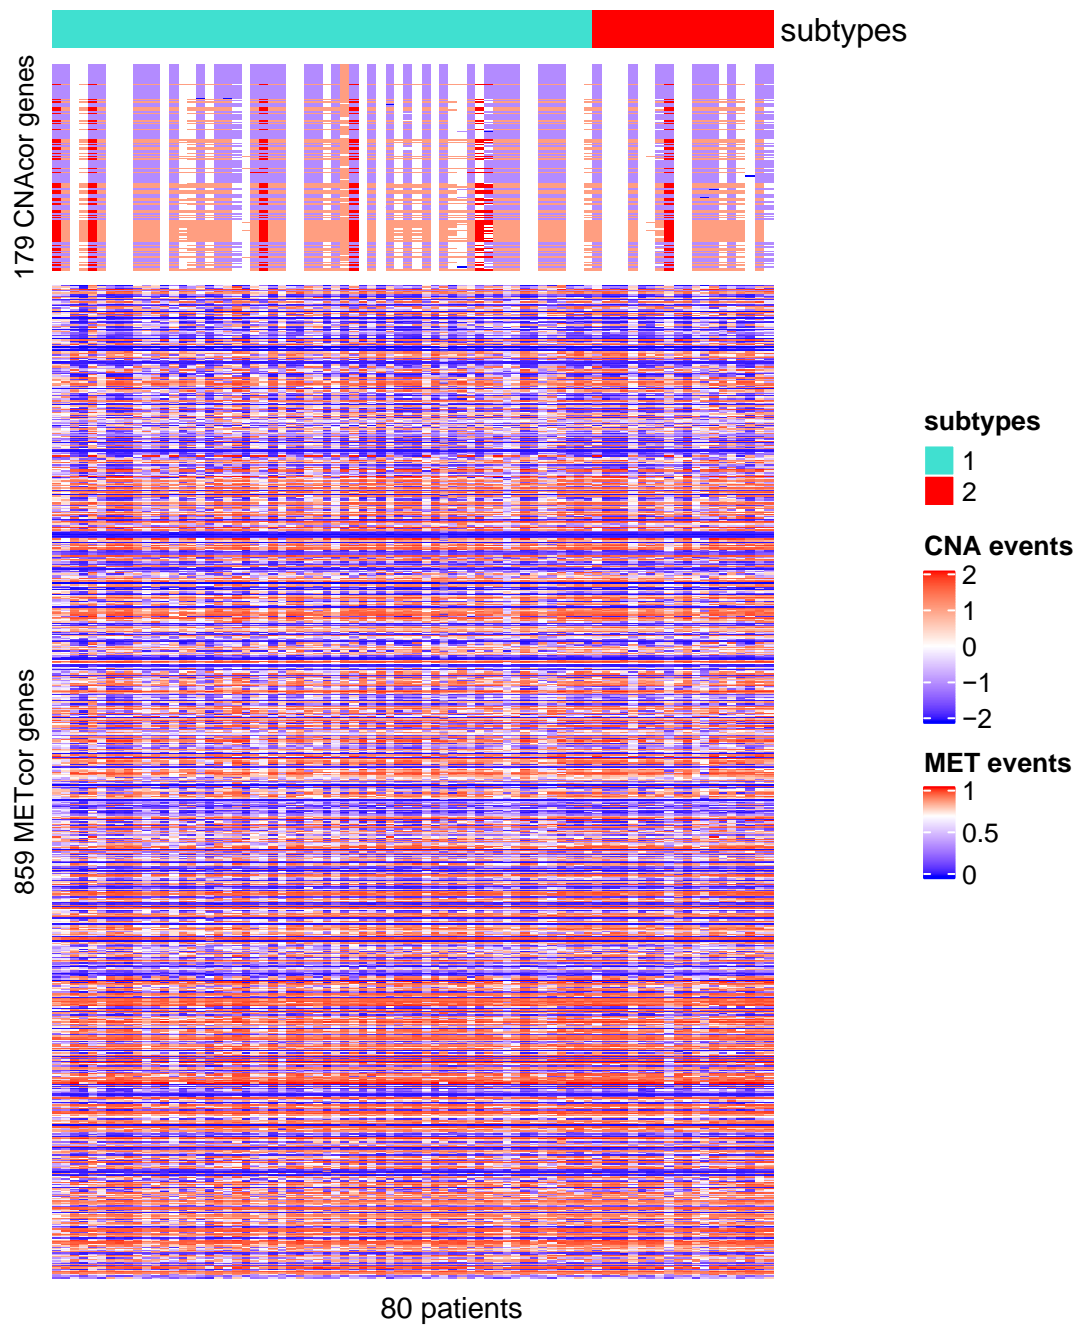

**Supplementary Figure 1.** Heatmaps that show the expression patterns of CNAexp subgroups (mid) and METexp subgroups (bottom) from integrated analysis by PINSPlus.

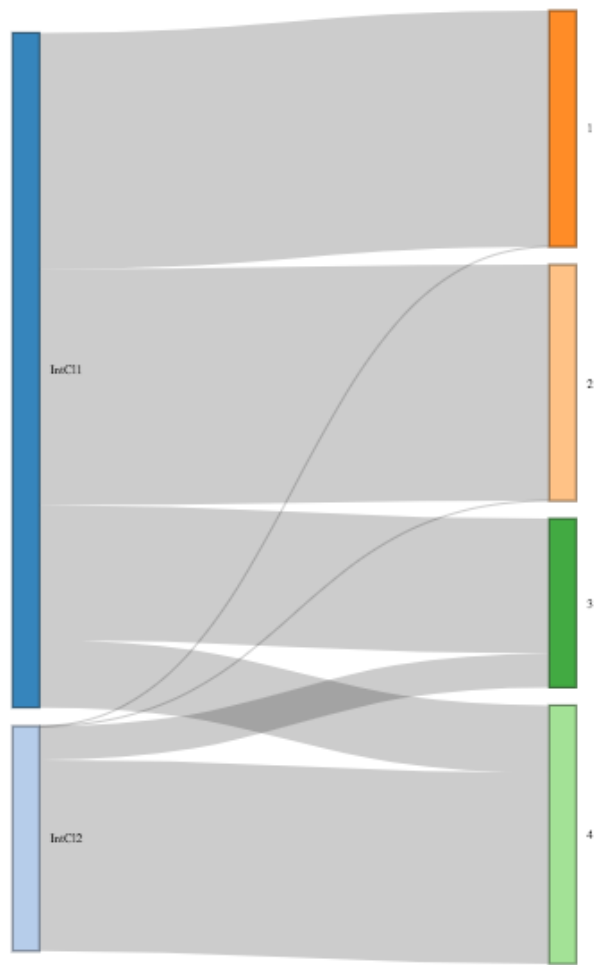

**Supplementary Figure 2.** Association between IntSub1 and IntSub2 subgroups (left) versus TCGA UVM classification [1] (right) using mRNA.

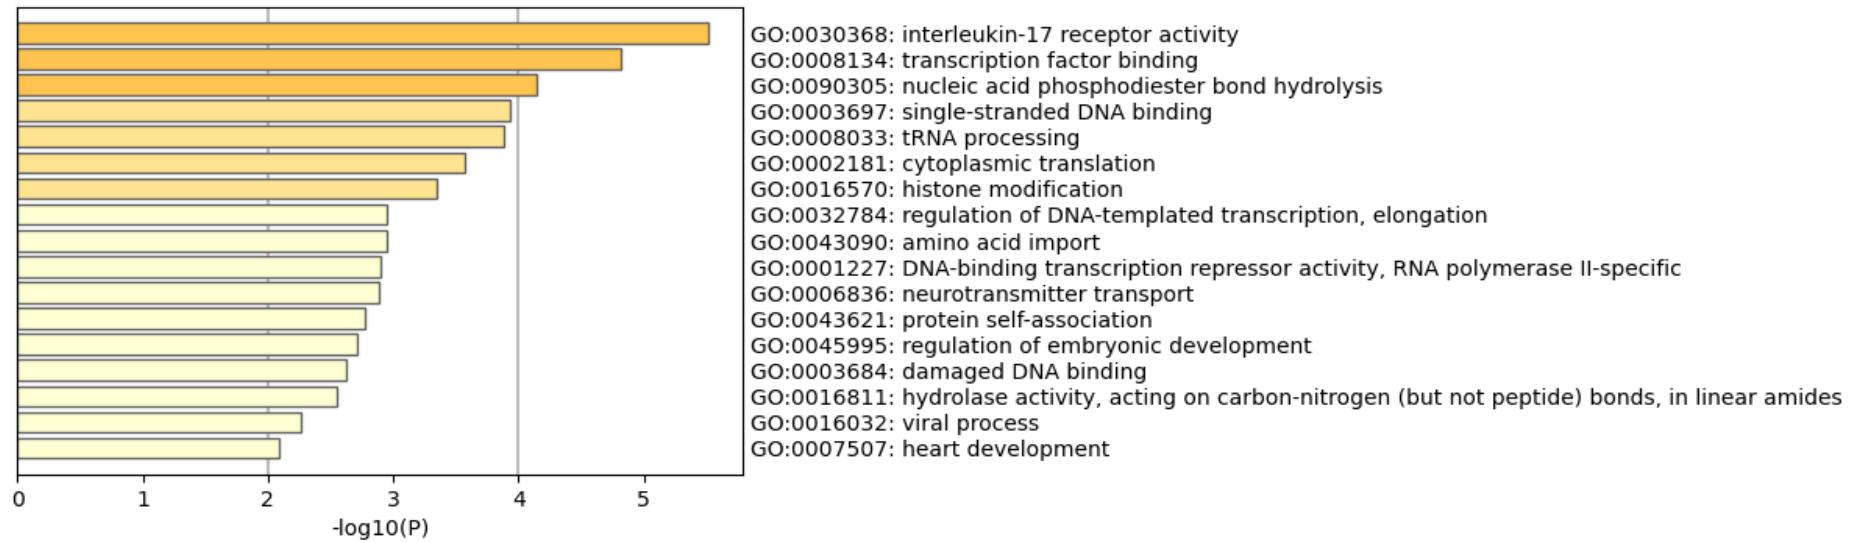

**Supplementary Figure 3.** Enrichment analysis with subtype-specific genes from CNAexp in IntSub1.

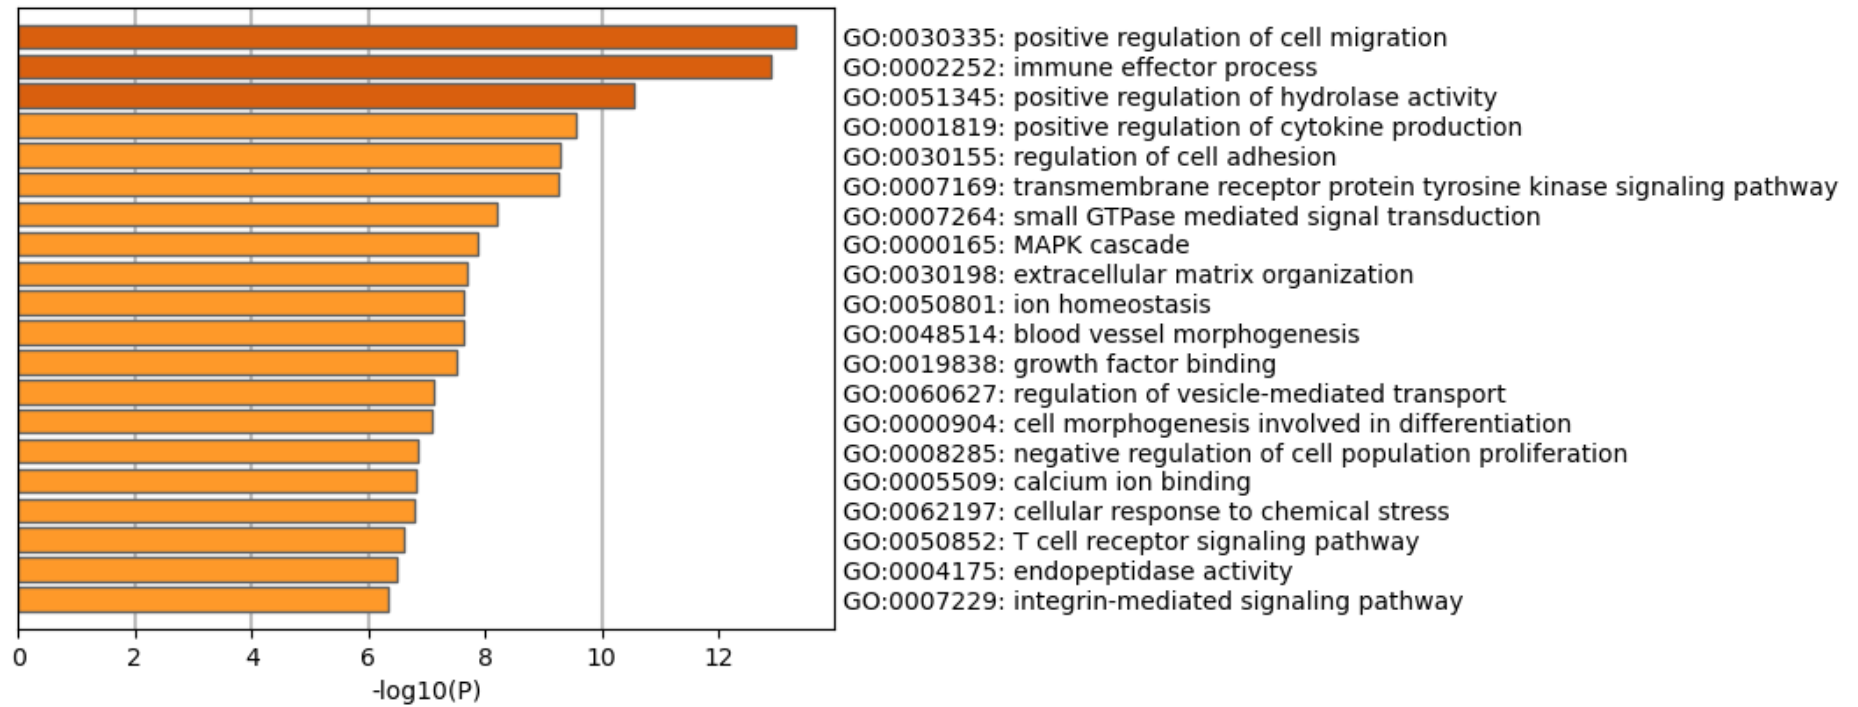

**Supplementary Figure 4.** Enrichment analysis with subtype-specific genes from METexp in IntSub1.

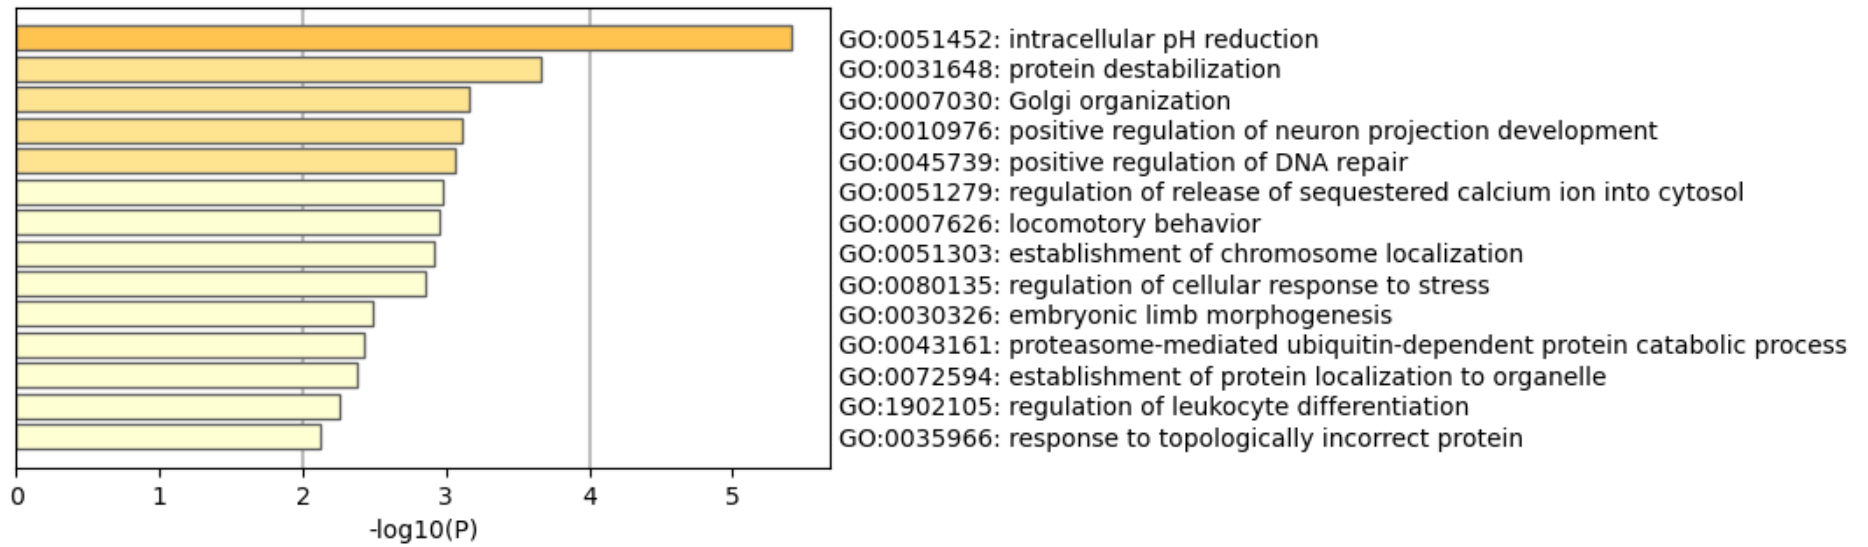

**Supplementary Figure 5.** Enrichment analysis with subtype-specific genes from CNAexp in IntSub2.

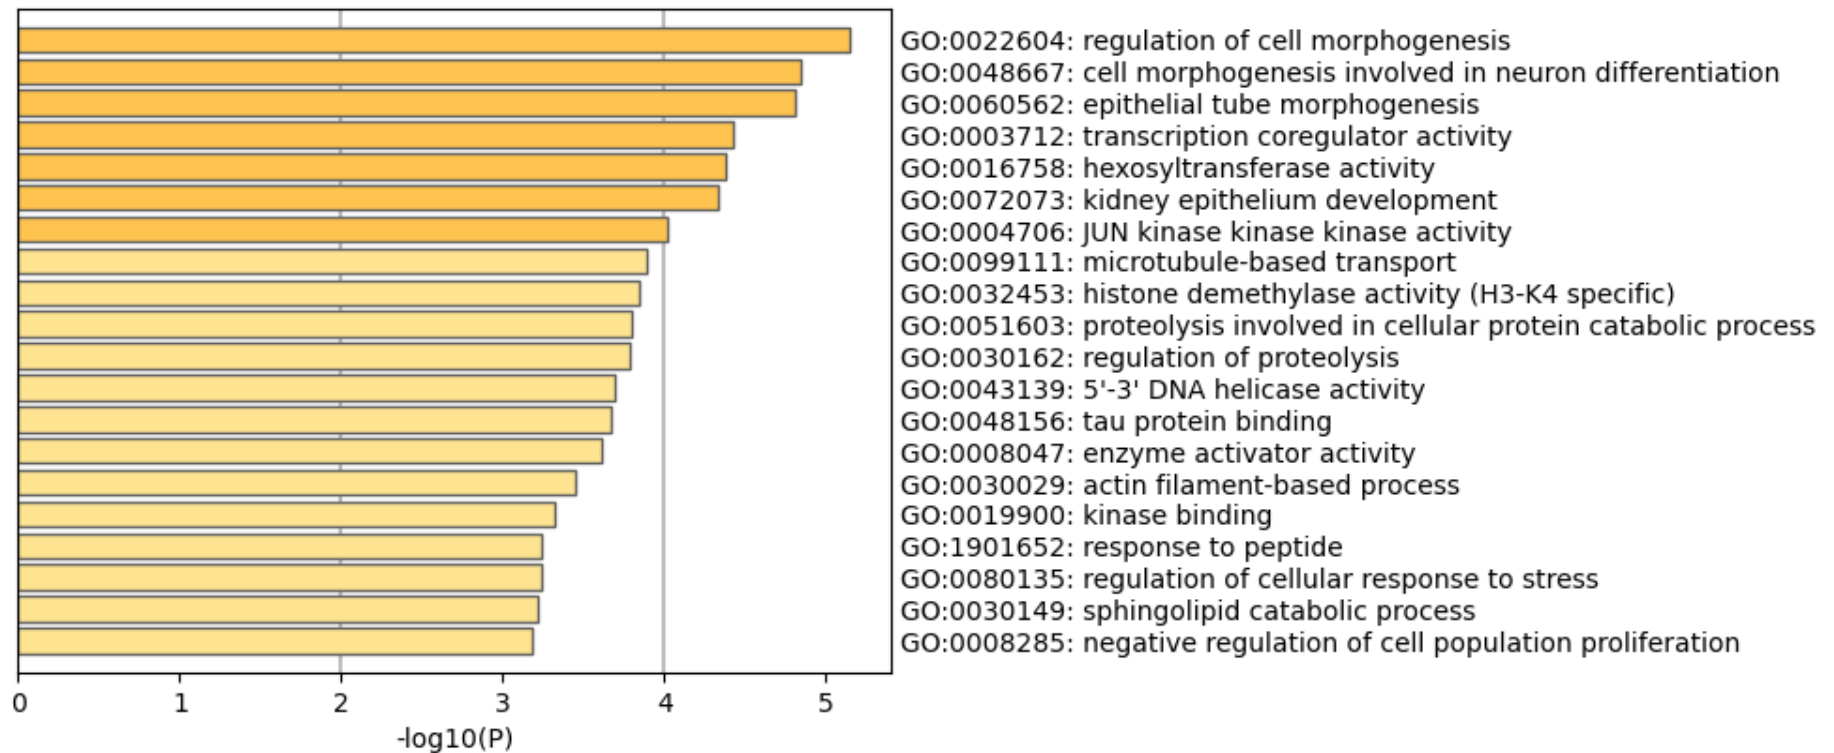

**Supplementary Figure 6.** Enrichment analysis with subtype-specific genes from METexp in IntSub2.

## Reference

1. Robertson, A.G., et al., *Integrative Analysis Identifies Four Molecular and Clinical Subsets in Uveal Melanoma*. *Cancer Cell*, 2017. **32**(2): p. 204-220.e15.
